# Supplementary figures and images for: Spatial assessment of soil contamination by heavy metals from informal electronic waste recycling in Agbogbloshie, Ghana
Source: PubMed Central journal article supplement — Environ Health Toxicol. 2016 Mar 17;31:e2016006. doi: 10.5620/eht.e2016006 (PMC5080776; doi:10.5620/eht.e2016006), 2016-03-17

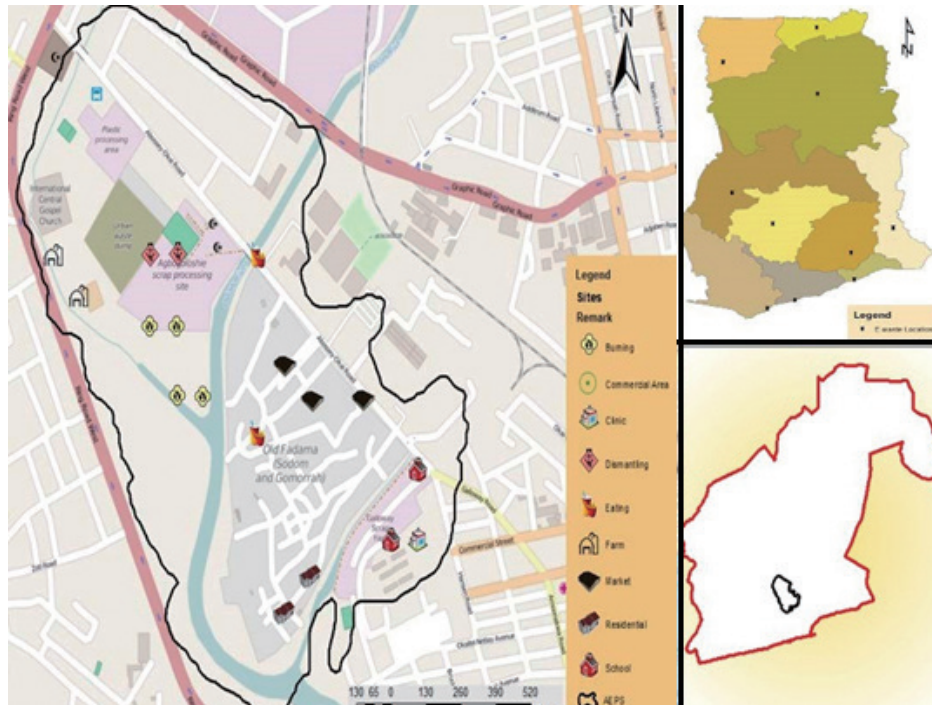

Figure S1. Location map of Agboglobloshie processing site.

Supplement: eht-31-e2016006-supple1.pdf [file eht-31-e2016006-supple1.pdf]

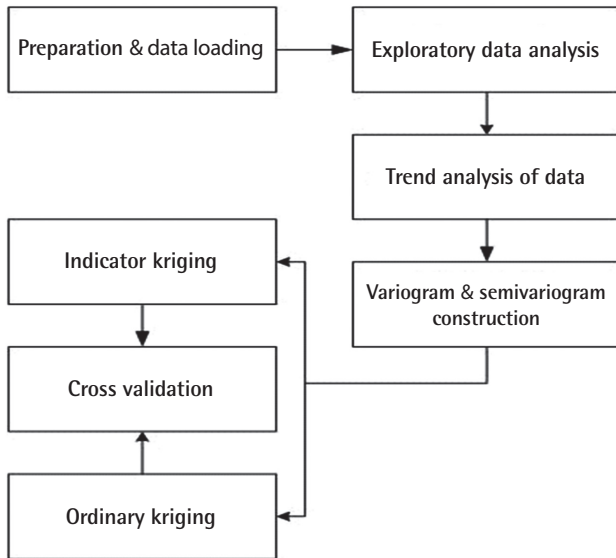

**Figure S2.** Steps involved in statistical and geostatistical data analysis.

Supplement: eht-31-e2016006-supple2.pdf [file eht-31-e2016006-supple2.pdf]

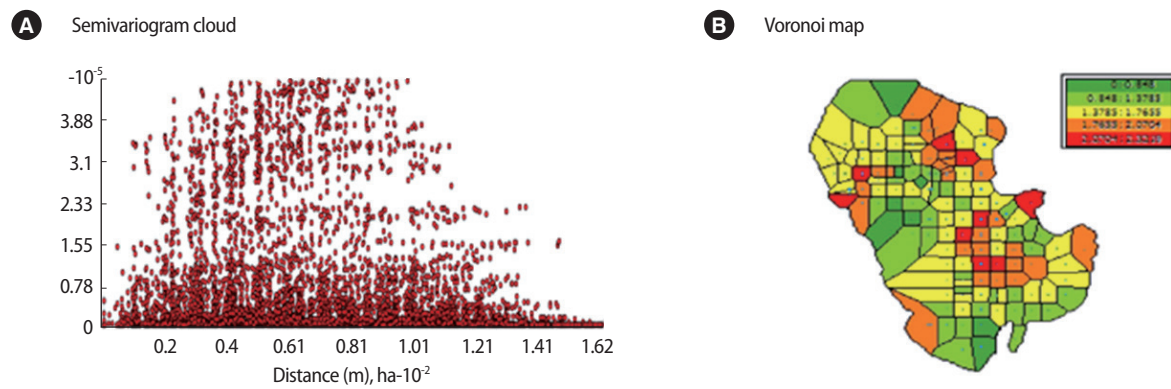

**Figure S3.** Semivariogram cloud (A) and voronoi map of degree of contamination (B).

Supplement: eht-31-e2016006-supple3.pdf [file eht-31-e2016006-supple3.pdf]
